# Supplementary material for: Expression of Markers Ki-67, Nestin, VEGF, CD34 and Apoptosis in Relatively Healthy Lung Tissue with Non-Changed and Metaplastic Bronchial Epithelium
Source: MDPI journal article supplement (doi:10.3390/medsci11010007), 2022-12-29
Supplement: s1 [file s1]

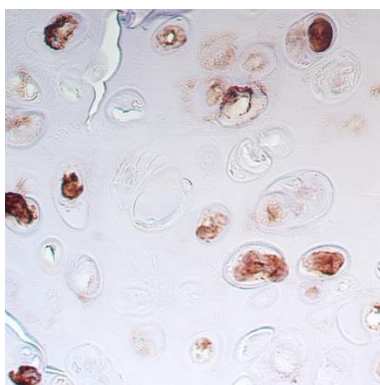

**a**

**a)** “++” - moderate number of positive structures (50%) seen in the visual field

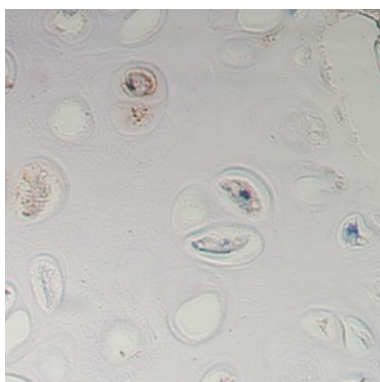

**b**

**b)** “+”- few positive structures (25%) seen in the visual field

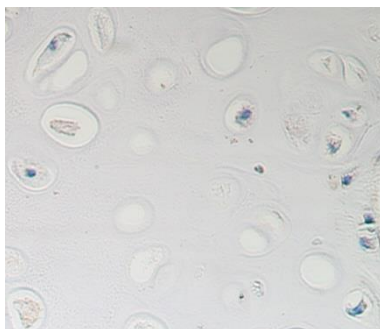

**c**

**c)** “0/+”- occasional positive structures (12,5%) seen in the visual field

**Figure S1.** Visualization of quantifications used by photos of nestin-positive cells in bronchial cartilage.
